# Supplementary material for: New thorium(iv)–arsonates with a [Th8O13]6+ octanuclear core
Source: Royal Society of Chemistry journal article supplement (doi:10.1039/c5dt01370d), 2015-01-01
Supplement: c5dt01370d1.pdf [file c5dt01370d1.pdf]

## New Thorium(IV)-Arsonates with a $[\text{Th}_8\text{O}_{13}]^{6+}$ Octanuclear Core

Xiang-Ying Qian, Tian-Hua Zhou and Jiang-Gao Mao\*

### Supporting Information

**Table S1.** Bond-valence sums (without the contribution from O-H bonds) of the oxygen atoms in the sulfo-phenyl-arsonate ligands for Compounds **1-3**.

**Table S2.** Hydrogen bonds distances [ $\text{\AA}$ ] and angles [deg.] for compounds **1-3**.

**Figure S1.** Simulated and measured XRD powder patterns for compounds **1-3**.

**Figure S2.** Morphologies of compounds **1(a)**, **2(b)** and **3(c)**.

**Figure S3.** IR spectra of compounds **1-3**.

**Figure S4.** ORTEP representation of the selected unit in compound **1**. The thermal ellipsoids are drawn at 50% probability level. Symmetry codes for the generated atoms: (a)  $-z+1, x-1/2, -y+1/2$ ; (b)  $y+1/2, -z+1/2, -x+1$ ; (c)  $-y+3/2, z+1/2, x-1$ ; (d)  $z+1, -x+3/2, y-1/2$ .

**Table S1.** Bond-valence sums (without the contribution from O-H bonds) of the oxygen atoms in the sulfo-phenyl-arsenate ligands for compounds **1-3**.

| Compound 1 |       |     |       |     |       |
|------------|-------|-----|-------|-----|-------|
| O1         | 1.988 | O2  | 2.009 | O3  | 1.995 |
| O4         | 1.983 | O5  | 1.792 | O6  | 2.020 |
| O7         | 1.949 | O8  | 1.132 | O9  | 1.913 |
| O10        | 1.966 | O11 | 1.703 | O12 | 1.671 |
| O13        | 1.301 |     |       |     |       |
| Compound 2 |       |     |       |     |       |
| O1         | 2.065 | O2  | 1.982 | O3  | 2.057 |
| O4         | 1.991 | O5  | 1.990 | O6  | 1.754 |
| O7         | 2.031 | O8  | 2.010 | O9  | 2.008 |
| O10        | 2.002 | O11 | 1.731 | O12 | 1.980 |
| O13        | 2.029 | O14 | 1.996 | O15 | 1.964 |
| O16        | 1.992 | O17 | 2.002 | O18 | 1.717 |
| O19        | 1.936 | O20 | 1.935 | O21 | 1.111 |
| O22        | 1.680 | O23 | 1.676 | O24 | 1.924 |
| O25        | 1.920 | O26 | 1.995 | O27 | 1.097 |
| O28        | 1.843 | O29 | 1.708 | O30 | 1.731 |
| O31        | 2.029 | O32 | 1.120 | O33 | 2.017 |
| O34        | 1.722 | O35 | 1.985 | O36 | 1.834 |
| O37        | 1.611 |     |       |     |       |
| Compound 3 |       |     |       |     |       |
| O1         | 1.983 | O2  | 2.016 | O3  | 2.003 |
| O4         | 1.913 | O5  | 1.930 | O6  | 1.932 |
| O7         | 2.004 | O8  | 1.985 | O9  | 1.157 |
| O10        | 2.286 | O11 | 1.898 | O12 | 2.022 |
| O13        | 2.127 | O14 | 2.104 | O15 | 2.054 |
| O16        | 1.774 | O17 | 2.112 | O18 | 1.692 |
| O19        | 1.972 | O20 | 2.024 | O21 | 2.029 |
| O22        | 1.812 | O23 | 1.968 | O24 | 2.074 |
| O25        | 1.997 | O26 | 1.991 | O27 | 1.192 |
| O28        | 1.676 | O29 | 1.588 | O30 | 1.861 |
| O31        | 1.961 | O32 | 1.902 | O33 | 1.170 |
| O34        | 1.726 | O35 | 1.788 | O36 | 2.048 |
| O37        | 2.129 | O38 | 1.879 | O39 | 0.808 |
| O40        | 2.177 | O41 | 1.504 | O42 | 1.541 |
| O43        | 1.892 | O44 | 1.822 | O45 | 1.154 |
| O46        | 1.852 | O47 | 1.689 | O48 | 1.934 |
| O49        | 2.053 | O50 | 2.067 | O51 | 2.046 |
| O52        | 1.902 | O53 | 1.917 | O54 | 2.068 |
| O55        | 1.976 | O56 | 2.052 | O57 | 1.976 |
| O58        | 1.981 | O59 | 2.054 | O60 | 2.086 |

|     |       |     |       |     |       |
|-----|-------|-----|-------|-----|-------|
| O61 | 2.170 | O62 | 2.064 | O63 | 2.096 |
| O64 | 2.223 | O65 | 1.827 | O66 | 2.043 |
| O67 | 1.964 | O68 | 1.931 | O69 | 1.036 |
| O70 | 1.812 | O71 | 1.994 | O72 | 1.867 |
| O73 | 1.803 |     |       |     |       |

**Table S2.** Hydrogen bonds distances [ $\text{\AA}$ ] and angles [deg.] for compounds **1-3**.

| D-H...A                  | d(D-H) | d(H...A) | d(D...A)  | <(DHA) |
|--------------------------|--------|----------|-----------|--------|
| <b>Compound 1</b>        |        |          |           |        |
| O(2W)-H(2WB)...O(6W)     | 0.85   | 2.17     | 2.67(5)   | 116.9  |
| O(5W)-H(5WB)...O(2W)     | 0.85   | 2.23     | 2.68(3)   | 113.2  |
| O(8W)-H(8WA)...O(1W)     | 0.85   | 1.92     | 2.77(7)   | 178.9  |
| O(1W)-H(1WB)...O(10)#1   | 0.85   | 2.53     | 2.70(2)   | 92.3   |
| O(2W)-H(2WA)...O(9)#1    | 0.85   | 2.19     | 2.715(15) | 119.6  |
| O(3W)-H(3WA)...O(8)#2    | 0.86   | 2.25     | 2.75(2)   | 117.0  |
| O(4W)-H(4WA)...O(12)#1   | 0.85   | 1.89     | 2.74(3)   | 179.4  |
| O(5W)-H(5WA)...O(12W)#3  | 0.85   | 1.82     | 2.67(11)  | 178.2  |
| O(6W)-H(6WB)...O(7W)#4   | 0.85   | 1.82     | 2.58(10)  | 147.3  |
| O(10W)-H(10B)...O(10W)#5 | 0.85   | 1.68     | 2.53(19)  | 179.6  |
| <b>Compound 2</b>        |        |          |           |        |
| O(21)-H(21A)...O(28)     | 0.82   | 1.94     | 2.743(7)  | 166.4  |
| O(1W)-H(1WA)...O(11W)    | 0.85   | 2.32     | 2.673(10) | 105.4  |
| O(1W)-H(1WA)...O(10)     | 0.85   | 2.65     | 2.773(8)  | 89.1   |
| O(1W)-H(1WB)...O(25)     | 0.85   | 2.36     | 2.729(7)  | 107.1  |
| O(5W)-H(5WB)...O(13W)    | 0.85   | 2.39     | 2.765(14) | 107.3  |
| O(2W)-H(2WA)...O(9W)     | 0.85   | 2.21     | 2.733(10) | 119.4  |
| O(3W)-H(3WC)...O(8W)     | 0.85   | 2.27     | 2.710(8)  | 112.4  |
| O(3W)-H(3WA)...O(5)      | 0.85   | 2.07     | 2.620(7)  | 122    |
| O(12W)-H(12E)...O(11W)   | 0.85   | 1.90     | 2.72(2)   | 164.1  |
| O(12W)-H(12D)...O(2W)    | 0.85   | 1.77     | 2.618(15) | 177.6  |
| O(13W)-H(13C)...O(5W)    | 0.85   | 2.30     | 2.765(13) | 114.5  |
| O(14W)-H(14B)...O(11)    | 0.85   | 1.79     | 2.645(17) | 179.7  |
| O(16W)-H(16B)...O(13W)   | 0.85   | 1.76     | 2.43(2)   | 133.4  |
| O(32)-H(32B)...O(6W)#1   | 0.82   | 1.93     | 2.740(8)  | 170.7  |
| O(3W)-H(3WA)...O(6)#2    | 0.85   | 2.08     | 2.706(6)  | 129.9  |
| O(4W)-H(4WA)...O(20)#1   | 0.85   | 2.10     | 2.611(7)  | 118.5  |
| O(5W)-H(5WA)...O(33)#1   | 0.85   | 2.22     | 2.714(6)  | 117.1  |
| O(6W)-H(6WA)...O(7W)#3   | 0.85   | 2.23     | 2.777(9)  | 122    |
| O(9W)-H(9WA)...O(16W)#4  | 0.85   | 1.85     | 2.70(2)   | 169.6  |
| O(11W)-H(11A)...O(10W)#2 | 0.85   | 1.97     | 2.791(18) | 162.1  |
| O(16W)-H(16B)...O(15W)#4 | 0.85   | 2.07     | 2.70(3)   | 130.9  |
| <b>Compound 3</b>        |        |          |           |        |
| O(1W)-H(1WA)...O(6)      | 0.85   | 2.08     | 2.62(4)   | 120.8  |
| O(1W)-H(1WA)...O(6W)     | 0.85   | 2.08     | 2.65(8)   | 123.2  |
| O(4W)-H(4WA)...O(70)     | 0.85   | 2.12     | 2.73(3)   | 128.9  |
| O(5W)-H(5WA)...O(46)     | 0.85   | 2.07     | 2.73(3)   | 133.3  |
| O(33)-H(33B)...O(46)#1   | 0.82   | 1.95     | 2.68(3)   | 147.8  |
| O(2W)-H(2WA)...O(39)#2   | 0.85   | 1.71     | 2.37(8)   | 133.5  |
| O(3W)-H(3WA)...O(29)#3   | 0.85   | 1.86     | 2.65(4)   | 153.7  |
| O(3W)-H(3WB)...O(11)#3   | 0.85   | 2.06     | 2.73(3)   | 134.5  |

O(4W)-H(4WB)...O(4I)#4      0.85      1.72      2.56(3)      172.2

---

Symmetry transformations used to generate equivalent atoms:

For **1**: #1  $-y+3/2, z+1/2, x-1$ ; #2  $-z+3/4, -y+3/4, -x+3/4$ ; #3  $z+1, -x+3/2, y-1/2$ ; #4  $y+3/4, -x+5/4, -z-1/4$ ; #5  $x+0, -y+1, -z-1/2$ .

For **2**: #1  $-x+1, -y+1, -z+1$ ; #2  $-x+2, -y+1, -z+1$ ; #3  $x, y+1, z$ ; #4  $-x+1, -y+1, -z$ .

For **3**: #1  $-x+3/2, -y+1, z+1/2$ ; #2  $-x+1, y-1/2, -z+3/2$ ; #3  $-x+1, y+1/2, -z+3/2$ ; #4  $-x+2, y-1/2, -z+3/2$ .

---

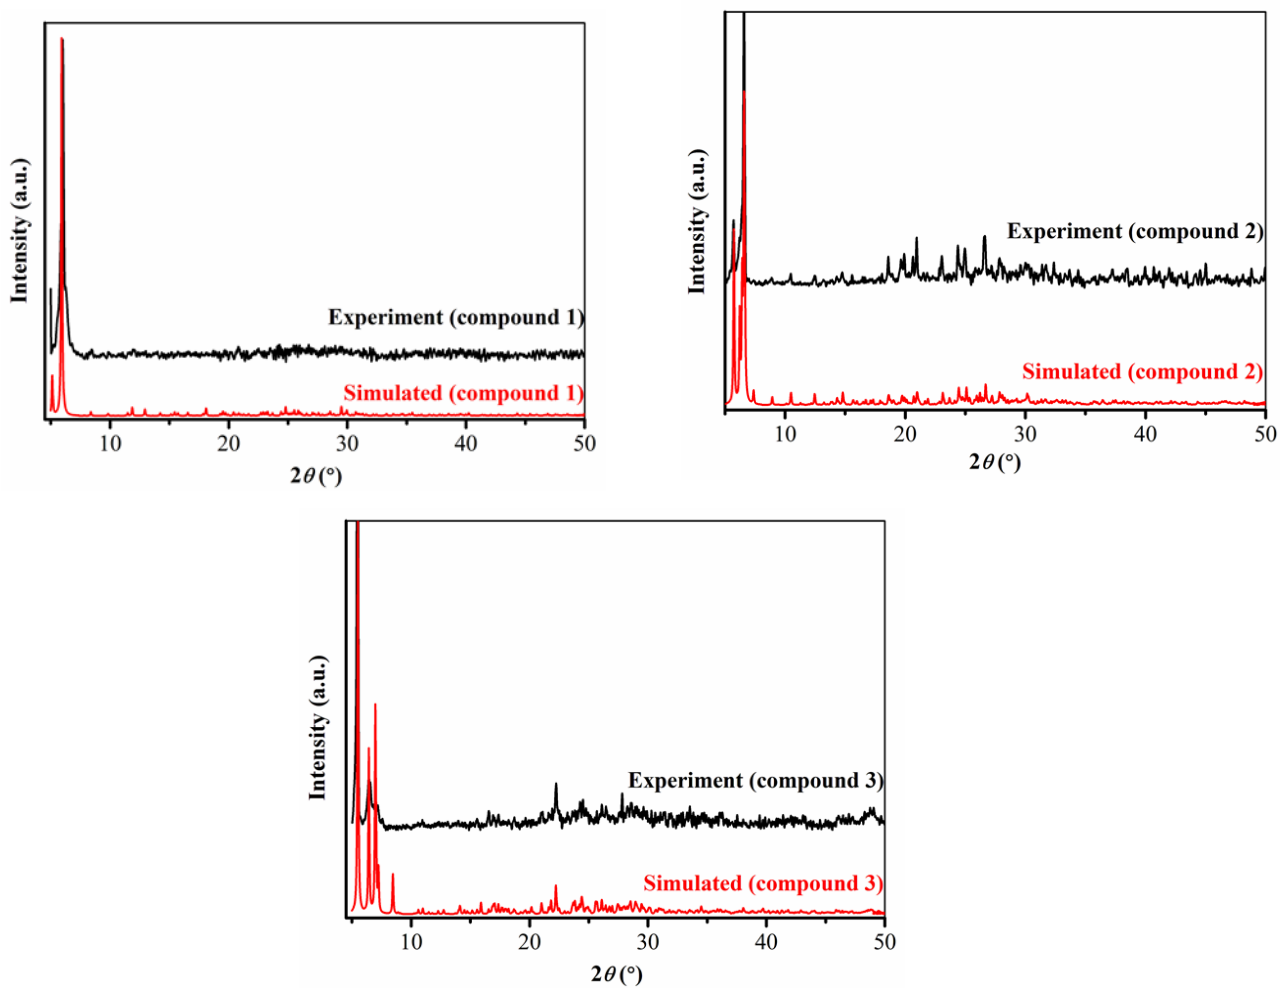

**Figure S1.** Simulated and measured XRD powder patterns for compounds 1-3.

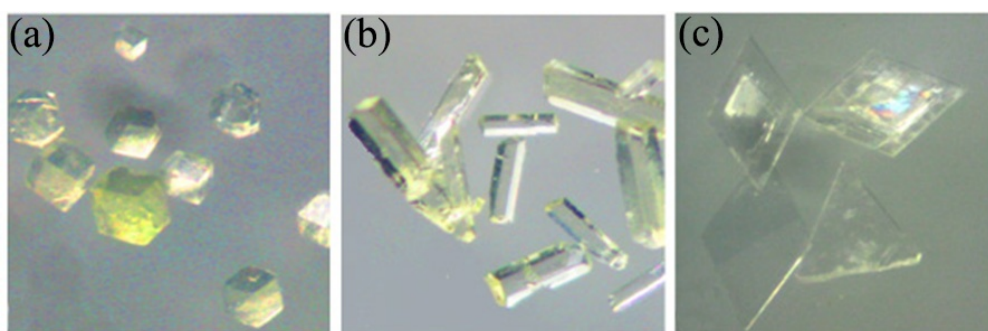

**Figure S2.** Morphologies of compounds 1(a), 2(b) and 3(c).

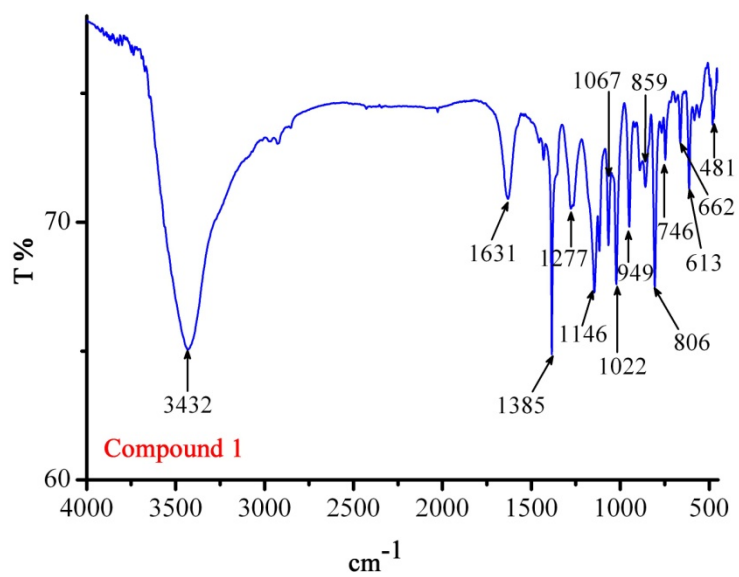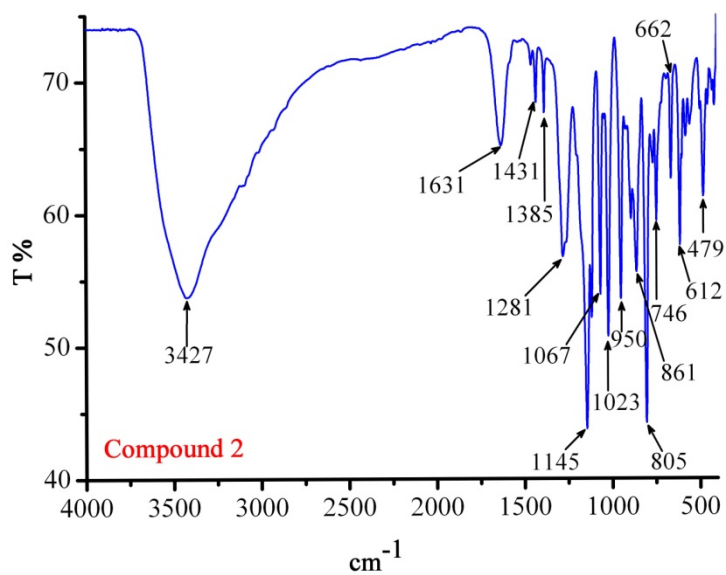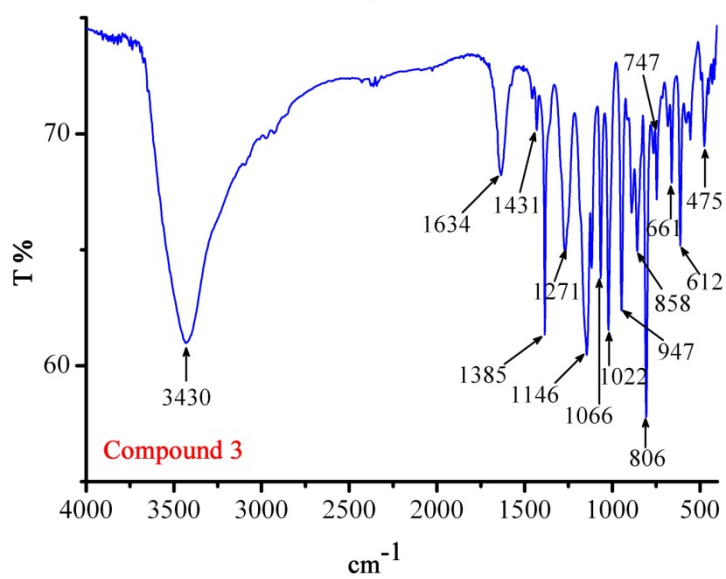

**Figure S3.** IR spectra of compounds 1–3.

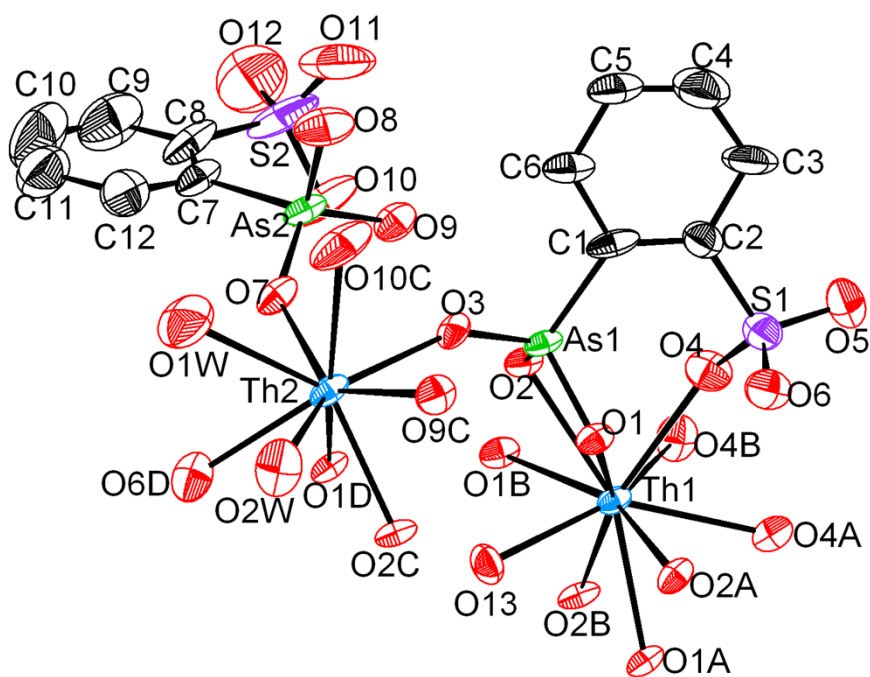

**Figure S4.** ORTEP representation of the selected unit in compound **1**. The thermal ellipsoids are drawn at 50% probability level. Symmetry codes for the generated atoms: (a)  $-z+1, x-1/2, -y+1/2$ ; (b)  $y+1/2, -z+1/2, -x+1$ ; (c)  $-y+3/2, z+1/2, x-1$ ; (d)  $z+1, -x+3/2, y-1/2$ .
